**Incline and peg spacing have interactive effects on the arboreal locomotor performance and kinematics of brown treesnakes (*Boiga irregularis*)**

Bruce C. Jayne<sup>\*</sup>, Justin T. Baum and Greg Byrnes<sup>†</sup>

*Department of Biological Sciences, University of Cincinnati, PO Box 210006, Cincinnati, OH 45221-0006, USA*

\*Correspondent: Bruce C. Jayne [bruce.jayne@uc.edu](mailto:bruce.jayne@uc.edu)

† Current Address:

Biology Department, Siena College, 515 Loudon Road, Loudonville, NY 12211

Running Head: Branch spacing affects snake locomotion

Keywords: arboreal, locomotion, performance, kinematics, snake, axial

1 Many animals move using lateral undulations, but snakes are noteworthy for using this type of  
2 locomotion in an unusual diversity of environments, including trees in which both the spacing  
3 and orientation of branches vary considerably. Despite branches providing discrete locations for  
4 snakes to generate propulsive forces during lateral undulation, the consequences of branch  
5 spacing for the locomotion of snakes are poorly understood. Hence, we determined maximal  
6 speeds and kinematics of an arboreal snake (*Boiga irregularis*) crawling on horizontal and  
7 vertical cylinders with pegs that simulated different spacing between secondary branches. Peg  
8 spacing, perch orientation, and their two-way interaction term had widespread, significant effects  
9 on both performance and kinematics. For the horizontal surfaces, maximal locomotor speed  
10 occurred with intermediate peg spacing, and it was nearly twice as fast as for both the smallest  
11 and largest peg spacings. By contrast, the locomotor speeds of snakes on the vertical surfaces  
12 were unaffected by peg spacing, and they were uniformly slower than those for the horizontal  
13 surfaces. For both perch orientations, the number of pegs touched by the snake decreased as peg  
14 spacing increased, and while touching only one peg the snakes crawled with apparent ease and  
15 steady speed. The snakes crawled vertically with only one peg as quickly as they did using 2-10  
16 pegs. Pegs on a horizontal cylinder are probably important both for propulsion of snakes and  
17 preventing long-axis rolling, whereas pegs protruding from vertical cylinders and those  
18 protruding from horizontal planar surfaces are probably used almost exclusively for propulsion.  
19

## INTRODUCTION

20  
21 Many phylogenetically diverse lineages of animals use axial bending for propulsion (Gray,  
22 1968). However, compared to most other taxa that use axial bending, snakes have a remarkable  
23 ability to traverse a greater variety of habitats, which is enhanced by having several different  
24 modes of locomotion that use axial bending (Gray, 1946; Gans, 1974; Jayne, 1986). The most  
25 common mode of snake locomotion is lateral undulation, which occurs in effectively all species  
26 and is often the most common mode within a species. During lateral undulation waves of lateral  
27 bending propagate posteriorly and push against objects in the environment, and the entire body  
28 of the animal has sliding contact with the supporting surfaces as each point along the animal  
29 follows a nearly identical path (Gray, 1946; Gans, 1974; Jayne, 1986). Despite underlying  
30 qualitative similarities for this mode, the speed and waveform of snakes using lateral undulation  
31 vary substantially depending on the surfaces encountered and the species of snake.

32 Terrestrial lateral undulation usually requires surfaces against which the sides of the body  
33 can push to produce anteromedial propulsive forces (Gray and Lissmann, 1950; Gans, 1974).  
34 Consequently, the number and spacing of such points of force application (points d'appui) are  
35 key features for understanding how structural variation of the environment can affect limbless  
36 locomotion. Several decades ago, a series of classic experiments with snakes moving on a  
37 smooth, flat surface and with a single row of peg-like objects, established that the lateral forces  
38 decrease substantially with a decreased number of points of force application until effectively all  
39 of the reactive force is directed forward for movement past a single peg, but the forward-directed  
40 forces remain nearly constant (Gray and Lissmann, 1950). However, the speeds of snakes  
41 crawling through large arrays of evenly spaced pegs on planar surfaces appear to be maximized  
42 when peg spacing is intermediate (Heckrotte, 1967; Bennet et al., 1974; Kelley et al., 1997).  
43 Furthermore, some review articles on snake locomotion have variously suggested that either two  
44 (Gans, 1962) or three (Gans, 1974) points of force application are required for terrestrial lateral  
45 undulation.

46 Although previous work has clearly established the importance of the number and  
47 spacing of points of force application for lateral undulation, several issues remain unclear. For  
48 example, maximal speed occurring with intermediate peg spacing seems at odds with a  
49 presumably optimal relationship between forward and lateral forces with only a single point of  
50 force application. This apparent contradiction could simply reflect the limited ranges of peg

51 spacing that have been used, or perhaps larger lateral forces for a given forward force are more  
52 relevant for energetic economy than for maximal speed. Previous studies that have determined  
53 performance and manipulated peg spacing also have not quantified the number of pegs actually  
54 touched by snakes, although snakes do seem likely to touch more pegs as the distance between  
55 pegs decreases. The irregular direction of travel and irregular waveforms that often occur when  
56 snakes move through arrays of pegs on a planar surface complicate measuring speed as well as  
57 the angle of the body relative to the overall direction of travel, and this latter variable is related to  
58 the direction of forces generated during undulatory locomotion.

59 The effects of peg spacing also have considerable ecological relevance for animals in  
60 arboreal habitats because secondary branches have a peg-like shape and they create conspicuous,  
61 discrete sites for force application with highly variable spacing (Mattingly and Jayne, 2004).  
62 Although many species of phylogenetically diverse snakes move in trees (Lillywhite and  
63 Henderson, 1993; Pizzatto et al., 2007; Hampton, 2011), the effects of branch (and peg) spacing  
64 on locomotor performance are known only for a few species of arboreal limbed vertebrates  
65 (Hyams et al., 2012; Jones and Jayne, 2012). For snakes, adding pegs (with constant spacing) to  
66 a cylindrical surface is known to: 1) elicit lateral undulation, 2) increase the maximal speed of  
67 locomotion, and 3) reduce the tendency to roll about the long axis of the supporting surface  
68 (Astley and Jayne, 2009; Jayne and Herrmann, 2011). Manipulating peg spacing along a  
69 cylindrical surface also has some practical advantages for clarifying the effects on waveform and  
70 speed because snakes on such surfaces often move with straighter overall trajectories than when  
71 they traverse wide arrays of pegs on planar surfaces.

72 We manipulated both peg spacing and the incline of the primary cylindrical surface to  
73 test how both of these factors affect the locomotor performance and kinematics of a highly  
74 arboreal species of snake (*Boiga irregularis*) that commonly uses lateral undulation. We used a  
75 very large range of peg spacing with one extreme that transiently allowed contact with only a  
76 single peg. Two alternative hypotheses seemed equally plausible for the expected effects of peg  
77 spacing on performance. Previous force data suggest that speed might be greatest when  
78 contacting only a single peg, whereas the results from snakes crawling through arrays of pegs  
79 suggest intermediate spacing is optimal for speed. For movement on cylindrical surfaces, the  
80 dual function of pegs for generating propulsive force and balancing could complicate these  
81 expectations. However, since the weight of the snake on a vertical cylindrical surface does not

82 cause long axis roll, comparing locomotion on vertical and horizontal surfaces can provide a  
83 useful test of whether different needs for balancing affect performance and aspects of posture  
84 such as how far the crests of waves are located from the supporting surface. The need of animals  
85 to lift their entire weight when climbing up a vertical surface led us to expect decreased maximal  
86 speeds for snakes on the vertically inclined surfaces compared to the horizontal surfaces with  
87 similar numbers of pegs, but if the prevention of long-axis rolling on horizontal surfaces is  
88 overwhelmingly difficult it could be the reverse.

89

90

## MATERIALS AND METHODS

91

### Experimental subjects

92 We used nine brown treesnakes (*Boiga irregularis*; Merrem, 1802) captured in Guam. All of the  
93 experiments were performed in a laboratory at the University of Cincinnati. The snakes were  
94 housed individually in cages with incandescent light bulbs that allowed them to behaviorally  
95 thermoregulate and attain daytime body temperatures from 25-33° C. The snakes had values of  
96 snout-vent length (mean±s.e.m. SVL=101±1.9 cm, range=101-118 cm), total length (mean  
97 TL=140±2.4 cm, range=130-152 cm), and mass (mean=174±7.9 g, range=141-203 g) that were  
98 as similar as was practical to obtain. All experiments were performed at least one week after the  
99 snakes had been fed. White paint marks at 25%, 50%, 75%, and 100% SVL provided landmarks  
100 for motion analysis. The care of animals and all procedures were approved by the Institutional  
101 Animal Care and Use Committee at the University of Cincinnati (protocol # 07-01-08-01).

102

103

### Experimental apparatus and procedures

104 We tested the locomotor performance of all snakes on five perches consisting of a metal cylinder  
105 (diameter=2.4 cm; length=273 cm) with pegs (diameter=6 mm; length=4 cm) oriented  
106 perpendicular to the long axis and arranged in a single row along the top center of the cylinder  
107 (Fig. 1). We used five different distances between adjacent pegs (10, 20, 30, 40, and 80 cm).  
108 The long axis of the perches had two orientations (horizontal and vertical). To encourage the  
109 snakes to crawl along the perch, we attached a cylinder (diameter=7.5 cm; length=15cm) with a  
110 blackened interior at the end of the perch opposite where the snakes were placed initially. To  
111 provide a standardized surface with a sufficient amount of friction and texture (Astley and Jayne,  
112 2007), we applied strips of duct tape (Nashua 394, Franklin, KY, USA) along the long axis of all

113 the cylindrical surfaces forming the perch. As explained in more detail elsewhere (Astley and  
114 Jayne, 2007), the frictional resistance of this tape with snake skin and the texture created by the  
115 rectangular array of fibers embedded in the tape seemed more likely to resemble natural branches  
116 than the extraordinarily smooth surfaces (metal pipe and manufactured hardwood pegs) that the  
117 tape covered. However, we also deliberately avoided using a surface for the cylinder with overly  
118 large projections which could render the pegs largely irrelevant for the locomotion of the snakes.

119 Prior to an experiment, the snakes were placed in individual cloth bags within a chamber  
120 that was 30-31°C. During experiments, we used a PE-1 infrared temperature gun (Pro Exotics,  
121 Littleton, CO, USA) to verify that all snakes had body temperatures between 29° and 31°C,  
122 which is within the range of field active body temperatures for this species (Anderson et al.,  
123 2005). For each treatment, we performed three trials in rapid succession by placing a snake onto  
124 the perch and gently touching the snake near the tail to encourage it to move at maximum  
125 velocity. Except for one day that had three treatments per snake, all other days had two or fewer  
126 treatments per snake. Whenever a snake performed more than one treatment per day, three hours  
127 of rest were provided between successive treatments. To minimize confounding influences of  
128 time and experience, the snakes were assigned to two groups, and each group experienced the  
129 treatments in a different randomized order.

### 130 **Image acquisition and analysis**

131 We videotaped simultaneous dorsal and lateral views of the snakes at 30 images  $s^{-1}$  using a two-  
132 camera (Basler piA640, Ahrensburg, Schleswig-Holstein, Germany) video system with MaxTraQ  
133 version 2.13 software (Innovision Systems, Inc., Columbiaville, MI, USA). A 30 Hz square-  
134 wave voltage was used as an external trigger to synchronize the images of both cameras. The  
135 cameras were positioned perpendicular to the long axis of the perches, and the midway point  
136 along the perch was near the center of the field of view of both cameras. The top-center line  
137 along the long axis of each perch contained the origin and the  $x$ -axis for our coordinate system.  
138 The  $y$ - and  $z$ - axes were both perpendicular to the long axis of the perch. The  $z$ -axis was in the  
139 plane containing the pegs, whereas the  $y$ -axis was perpendicular to this plane.

140 For all of the nine snakes, we quantified the average forward velocity of the landmark at  
141 50% SVL for 20 cm of forward movement ( $x$ -direction) immediately prior to this landmark  
142 passing the middle peg of each perch and another 20-cm interval immediately after this landmark  
143 passed the middle peg of the perch. The locomotor performance of each snake ( $\text{Max } v_x$ ), was the

144 single greatest value of all these velocities (for 20 cm of forward movement) from the three trials  
145 per treatment. We chose the largest value of peg spacing so that the snakes would have some  
146 locomotion using only one peg, and depending on the snake length and how convoluted the  
147 snake was, this usually occurred when the location at 50% SVL was within 20 cm of the peg at  
148 the middle of the long axis of the perch. Occasionally the snakes paused during the performance  
149 trials, but choosing only a 20 cm interval usually allowed us to obtain locomotion without  
150 pausing. We consistently used a 20 cm interval to determine maximal speed of all of our  
151 treatments because the values of maximal speed usually decrease with an increase in the distance  
152 used to make this measurement.

153 For the five snakes with the greatest grand mean of  $\text{Max } \mathbf{v}_x$  across all treatments, we also  
154 quantified several variables describing the contact points and posture of the snake on the perch at  
155 the time when the mid-body landmark was at the middle peg along the length of the perch in the  
156 20-cm interval used to determine  $\mathbf{v}_x$ . Four variables quantified the number and nature of  
157 locations where the body of the snake interacted with solid surfaces and hence where significant  
158 forces were likely to occur. We counted the number of regions in which the dorsal midline of  
159 the snake crossed the  $x$ -axis (Fig. 1,  $N_{cr}$ ). Rather than merely assuming that snakes contacted  
160 more pegs when the space between successive pegs was smaller, we determined the number of  
161 pegs touched by the snake simultaneously at all locations ( $N_{\text{peg\_all}}$ ) and for locations likely  
162 ( $N_{\text{peg\_prop}}$ ) or unlikely ( $N_{\text{peg\_nonprop}}$ ) to be useful for propulsion (Fig. 1).

163 If we could not discern a gap between the body of the snake and a peg, then this was  
164 classified as a peg that had been touched. Our video images and methods were not able to clarify  
165 additional details such as how hard the snakes pressed against a peg or whether or not the body  
166 wall had a curvature different from the mid-dorsal line as been described for the terrestrial  
167 locomotion past pegs of some other species of snakes that are much heavier than the snakes in  
168 our study (Gasc et al., 1989; Moon and Gans, 1998). Thus, whether a peg was considered a  
169 “propulsive” peg was based only on its position relative to the body of the snake and the  
170 direction of movement (Fig. 1). For example, if a peg was located on the trailing edge of a half  
171 wave so that a normal reactive force arising from could have forward-directed component  
172 parallel to the overall direction of movement (Fig. 1, green dot), then this was considered a  
173 propulsive peg. By contrast, pegs that touched the leading edge of a half wave (Fig. 1, red dot)  
174 or precisely at the crest of a half wave were considered non-propulsive pegs.

175 For each of the propulsive pegs, we determined  $\alpha$ , the angle between the tangent through  
176 the midline of the snake where the body of the snake touched the peg and the  $x$ -axis (Fig. 1).  
177 This angle has strong implications for the orientation and proportion of forces that ultimately  
178 contribute to propulsion when snakes undulate past solid objects (Gray and Lissmann, 1950). To  
179 obtain an overall indicator of how convoluted the snake was, we measured the total distance  
180 between the head and tail of the snake ( $x_{ht}$ ) along the  $x$ -axis (Fig. 1), and we expressed this as a  
181 proportion of the total length (TL) of the snake. In addition to  $x_{ht}$  clarifying the amount of  
182 longitudinal space required for the snakes to move, this variable also allowed us to directly  
183 compare the effect of peg spacing in our study to those observed in the most detailed previous  
184 study of peg spacing and locomotor performance (Kelley et al., 1997).

185 For each half wave ( $0.5\lambda$ ) we determined the lateral amplitude ( $y_{crest}$ ), and the  $x$ -distance  
186 from the anterior node to the crest of the half wave ( $x_{crest}$ ) was measured and expressed as a  
187 proportion of the half-wave length (Fig. 1). We determined the maximal width of the snake  
188 ( $y_{max}$ ) by adding the largest amplitudes of half waves to the left and the right of the snake (Fig.  
189 1). For each half wave that was visible in the lateral view camera, we determined the  $z$ -distance  
190 between the top-center line of the perch and the most ventral portion of the half wave. For each  
191 individual and treatment we determined the maximal ( $z_{max}$ ) and mean ( $z_{crest}$ ) value for these  
192 measurements of half-wave depth. Collectively these remaining variables further determine the  
193 extent to which the shape of the snake conformed to the shape and locations of the objects  
194 traversed by the snake. For example, a snake could theoretically use the same large amplitude,  
195 large wavelength undulations when pegs are far apart as when pegs are closer together if it  
196 simply failed to touch each successive peg. Different locations of the crests of waves also have  
197 different implications for stability. For example, when moving on horizontal cylindrical surfaces  
198 lowering the crest of a wave beneath the cylinder is a mechanism for increasing stability by  
199 lowering the center of gravity and functioning like a pendulum, whereas a large lateral excursion  
200 can be disadvantageous because it could generate a torque that causes long axis rotation about  
201 the supporting cylinder (Jayne and Herrmann, 2011).

202

### Data analysis

203 Each quantity describing either performance or kinematics was used as the dependent variable in  
204 a three-way mixed-model analysis of variance (ANOVA). The independent variables (factors) in  
205 each ANOVA were peg spacing ( $N = 5$ ), incline ( $N = 2$ ) and individual, and all three of these



206 factors were fully crossed. In each ANOVA, incline and peg spacing were fixed factors, whereas  
207 individual was a random factor. Data from all nine snakes were used in the ANOVA for  
208 performance, whereas data from only the five fastest individuals were used in each ANOVA of a  
209 kinematic variable. For dependent variables such as maximum speed and some kinematic  
210 variables such as the total number of pegs touched, we had only one observation per treatment  
211 per individual, whereas for each of the kinematic variables ( $\alpha$ ,  $y_{\text{crest}}$ ,  $x_{\text{crest}}$ ,  $z_{\text{crest}}$ ,  $0.5\lambda$ ) with  
212 multiple observations along the length of a snake within a single treatment we calculated a mean  
213 value per treatment. Thus, in each ANOVA, each individual had only one value of the  
214 dependent variable for each combination of incline and peg spacing. We used  $P < 0.05$  as the  
215 criterion for statistical significance. To facilitate evaluating the effects of multiple comparisons  
216 (Moran, 2003), we provide exact  $P$ -values. All mean values are reported  $\pm$ s.e.m.

## 218 RESULTS

219 For all of the trials used to quantify locomotor performance, the locomotion of the snakes  
220 conformed to previous definitions of lateral undulation. Waves of bending were propagated  
221 posteriorly along the body of the snake, but the waves formed a standing pattern relative to the  
222 supporting surface as the pegs prevented backwards slipping (Fig. 2). All points along the snake  
223 moved simultaneously with continuously sliding contact with the supporting surface. Different  
224 points along the length of the snake more or less followed the same path, but this was less  
225 evident for the larger distances between pegs (Fig. 2B) compared to the surfaces with smaller  
226 distances between pegs (Fig. 2A).

227 A noteworthy feature of the lateral undulation that we observed, especially when snakes  
228 were moving vertically, was how loosely the body was draped across the cylinder, which often  
229 contributed to sizable gaps between the body and the cylinder that were evident in a dorsal view  
230 (Figs 2, 3). This body posture at the crossing regions during arboreal lateral undulation differs  
231 substantially from the tight wrapping and greater encirclement that has been described for the  
232 arboreal concertina locomotion of snakes (Astley and Jayne, 2007; Jayne and Herrmann, 2011).  
233 Surprisingly, some snakes in our study also occasionally climbed vertically with a sizeable gap  
234 between their ventral scales and the cylinder at the base of a peg that they were pushing against.  
235 Thus, no appreciable active gripping of the cylinder appears to occur for the type of arboreal  
236 lateral undulation involving pegs that we observed.

237 A three-way ANOVA revealed that both peg spacing ( $F_{4,32}=4.2$ ,  $P=0.008$ ) and incline  
238 ( $F_{1,8}=19.3$ ,  $P=0.002$ ) had significant effects on locomotor performance, but the effect of peg  
239 spacing was highly dependent upon the incline (incline x spacing  $F_{4,32}=6.2$ ,  $P=0.001$ ). For the  
240 horizontal surfaces, the mean value of Max  $v_x$  was greatest for the 40 cm peg spacing ( $17.8\pm 2.4$   
241  $\text{cm s}^{-1}$ ) which was nearly twice as large as the values for the 10 cm ( $10.5\pm 1.6 \text{ cm s}^{-1}$ ) and 80 cm  
242 ( $10.9\pm 1.4 \text{ cm s}^{-1}$ ) peg spacing (Fig. 4). The mean values of Max  $v_x$  (grand mean =  $6.5 \text{ cm s}^{-1}$ ) for  
243 locomotion up the vertical surface were not much more than one-half the lowest values observed  
244 for snakes on the horizontal surfaces. Two-way ANOVAs (factors: peg spacing; individual)  
245 performed separately for data from the two different inclines confirmed that peg spacing lacked a  
246 significant effect on Max  $v_x$  for the vertical surfaces ( $F_{4,32}=0.4$ ,  $P=0.8$ ) but had a highly  
247 significant effect for the horizontal surfaces ( $F_{4,32}=8.3$ ,  $P=0.001$ ).

248 In addition to affecting performance, peg spacing and incline commonly affected  
249 kinematics. For example, the number and nature of the contact regions between the snake and  
250 the supporting surfaces also varied considerably among the different treatments (Figs 3, 5; Table  
251 1). The number of regions where the midline of the snake crossed the midline of the supporting  
252 surface decreased significantly with increased distance between adjacent pegs, and for a given  
253 peg spacing the snakes usually had fewer crossing regions when moving up the vertical surface  
254 than when moving horizontally (Fig. 5A). The total number of pegs (Fig. 5B) and the number of  
255 propulsive pegs (Fig. 5C) touched by the snakes also decreased significantly with increased  
256 distance between pegs (Table 1), but incline did not have a significant effect on these variables  
257 (Table 1). Peg spacing and incline had a significant interactive effect on  $N_{\text{peg\_nonprop}}$  (Table 1) as  
258 a result of snakes commonly touching one or two non-propulsive pegs while moving on the  
259 horizontal surfaces with the two smallest values of peg spacing, but in most other circumstances  
260 nearly all of the pegs touched by the snakes were propulsive pegs (Fig. 5D).

261 The waveforms created by the bodies of the snakes also commonly had substantial  
262 variation among the different surfaces (Fig. 3). Especially on the horizontal surfaces with peg  
263 spacing  $< 30 \text{ cm}$ , the waves of lateral bending of the snakes closely resembled a sinusoidal  
264 function, whereas with increased distance between pegs many of the waves resembled a square  
265 wave with an amplitude that was small compared to the wavelength (Fig. 3). The waveforms of  
266 snakes on the vertical surfaces (Fig. 3B) were often less regular than those observed for snakes  
267 on the horizontal surfaces (Fig. 3A).

268 All four of the variables ( $y_{\max}$ ,  $z_{\max}$ ,  $y_{\text{crest}}$ , and  $z_{\text{crest}}$ ) describing the lateral and ventral  
269 measurements of the half waves varied significantly with peg spacing, but they all lacked a  
270 significant peg-spacing by incline interaction effect (Table 1). For both inclines, the maximum  
271 width (Fig. 6A) and mean lateral amplitude (Fig. 6C) of the snake increased from the 10 cm to  
272 the 20 cm peg spacing but changed little with further increases in peg spacing. The values of  
273  $y_{\max}$  and  $y_{\text{crest}}$  were also significantly greater for movement up the vertical surface than for the  
274 movement on the horizontal surface (Fig. 6A,C; Table 1). For  $y_{\max}$  the greatest mean value  
275 ( $11.8 \pm 1.1$  cm) occurred for locomotion on the horizontal surface with the 20 cm peg spacing.  
276 Both the maximum (Fig. 6B) and mean (Fig. 6D) ventral locations of the wave crests increased  
277 from the 10 to 40 cm spacing, but few differences were apparent between the two different  
278 inclines. For  $z_{\max}$  the greatest mean value ( $5.8 \pm 2.0$  cm) occurred with the horizontal surface with  
279 40 cm peg spacing, which indicates that the greatest amount of ventral sagging coincided with  
280 the conditions that optimized speed.

281 The angle of the body of the snake at the point of contact with the propulsive pegs had  
282 highly significant variation with peg spacing and its two-way interaction with incline (Table 1;  
283 Fig. 7C). On the vertical surface  $\alpha$  had the smallest values when peg spacing was smallest  
284 ( $41 \pm 2.6$  deg), and  $\alpha$  increased asymptotically with increased spacing up to a maximum value of  
285 nearly 90 deg ( $89 \pm 1.4$  deg). By contrast, for the horizontal surfaces the values of  $\alpha$  had little  
286 regular variation with peg spacing, and the grand mean was 36 deg (Fig. 7C). For both inclines,  
287 half wavelength had similarly small values for the smallest peg spacing (Fig. 7B). Half  
288 wavelength was often greater for locomotion on the vertical surface (Fig. 7B), but incline did not  
289 have a statistically significant effect on this variable (Table 1). The values of  $x_{\text{crest}}$  were usually  
290 near 0.5, indicating many of the half waves were fairly symmetrical (Fig. 7A). However, for the  
291 largest peg spacing and the vertical surface, the mean value of  $x_{\text{crest}}$  ( $0.73 \pm 0.08$ ) indicated that the  
292 crests of the waves were often shifted posteriorly and in the downhill direction (Fig. 3B). The  
293 head-to-tail distance lacked variation that was clearly significant (Table 1), but  $x_{\text{ht}}$  was often  
294 greatest with the smallest peg spacing and slightly smaller for the vertical compared to the  
295 horizontal surfaces (Fig. 7D).

296

297

## DISCUSSION

298 The inclines of surfaces and the spacing of branches are two features of natural arboreal  
299 habitats that vary considerably (Mattingly and Jayne, 2004), and the brown treesnakes in Guam  
300 that we observed and collected moved on branches with a wide range of both slopes (from  
301 horizontal to vertical) and spacing between secondary branches. Both slope and branch spacing  
302 had widespread effects on the locomotion of the snakes in our study. However, peg spacing had  
303 more pervasive effects on the kinematics of the snakes than incline. The interactive effects of  
304 peg spacing and incline on the locomotor performance (Fig. 4) and body angle (Fig. 7C) of  
305 brown treesnakes were especially striking. Two unexpected findings were the apparent ease with  
306 which snakes moved when touching only a single peg and the lack of a significant effect of peg  
307 spacing on the locomotor performance of snakes climbing up the vertical surface.

308 Key features of environmental structure are the coarseness and regularity of how objects  
309 are spatially distributed, but compared to some resources such as food, data are limited for the  
310 effects of the spatial distribution of the objects involved in the locomotion of animals (Kelley et  
311 al., 1997; Mattingly and Jayne, 2004; Goodman, 2009). Variation in the size, orientation, and  
312 spacing of branches in arboreal habitats (Mattingly and Jayne, 2004) creates an interesting  
313 amount of complexity, and all of these attributes of branches can be readily simulated. However,  
314 previous experimental manipulations of branch spacing to determine effects on locomotion are  
315 limited to only a few arboreal limbed vertebrates such as anole lizards (Jones and Jayne, 2012)  
316 and mice (Hyams et al., 2012). For the arboreal locomotion of snakes, the presence or absence  
317 of pegs has been manipulated (Astley and Jayne, 2009; Jayne and Herrmann, 2011), but our  
318 study is the first to manipulate peg spacing. Consequently, most previous insights regarding the  
319 effects of peg spacing on snake locomotion must be derived from experiments using variable peg  
320 spacing for snakes crawling horizontally on planar surfaces (Gray and Lissmann, 1950;  
321 Heckrotte, 1967; Bennet et al., 1974; Jayne, 1986; Kelley et al., 1997).

322 The effects of objects such as pegs and secondary branches on locomotion depend on the  
323 body plan of the animal. For limbed animals moving horizontally, vertically oriented objects  
324 such as pegs impede locomotion unless the animal has sufficient space to detour around such  
325 objects without taking an overly circuitous route (Hyams et al., 2012; Jones and Jayne, 2012).  
326 By contrast, peg-like objects that are perpendicular to the surface supporting the ventral surface  
327 of the animal can facilitate the lateral undulation of limbless animals such as snakes by providing  
328 suitably oriented surfaces for applying posterior-laterally directed forces to generate thrust (Gray

329 and Lisssmann, 1950). At one extreme, pegs spaced less than a body width could also create a  
330 barrier for a limbless animal, and at the other extreme, pegs more than a body length apart could  
331 not be used continuously to generate propulsive forces for undulatory locomotion. However,  
332 additional variation in peg spacing between these extremes can also affect snake locomotion.

333 A long-standing suggestion has been that three lateral points of force application are  
334 needed for terrestrial lateral undulation (Gans, 1974). The body posture and performance of  
335 snakes in this study moving past a single peg may suggest otherwise, but regions of the body  
336 other than the location touching the peg may help to obtain the balance of forces necessary for  
337 stable forward motion, especially when such regions touching the cylinder are flexed ventrally.  
338 However, additional circumstances have been described when snakes may use lateral undulation  
339 without any obvious points of lateral contact such as when boa constrictors move on very  
340 slender, cylindrical, horizontal surfaces (Jayne and Herrmann, 2011) or when rat snakes move on  
341 very smooth planar surfaces (Hu et al., 2009).

342 Our study and some previous studies of terrestrial snake locomotion found large effects  
343 of peg spacing on performance (maximal speed). For example, juvenile garter snakes crawling  
344 through arrays of pegs on a flat surface have mean speeds with a peg spacing of 8% TL that are  
345 approximately 50% and 25% greater than those for peg spacings of 21% TL and 6% TL,  
346 respectively (Kelley et al., 1997). For peg spacing from 5-18% TL (Jayne, 1986) rat snakes and  
347 water snakes are fastest with the largest peg spacing. For another species of North American rat  
348 snake, the speed of locomotion with a peg spacing of 19% TL exceeds that for a spacing of 43%  
349 TL (Bennet et al., 1974). Thus, peg spacing from approximately 10-20% TL often appears well  
350 suited for snakes to attain high speeds of terrestrial lateral undulation. In our study peg spacing  
351 ranged from a mean value of  $7 \pm 0.1\%$  TL to  $57 \pm 1\%$  TL, and the maximal value of speed for  
352 brown treesnakes on the horizontal surfaces, which occurred with a spacing of  $28 \pm 0.5\%$  TL, was  
353 nearly twice the values for both the smallest and largest peg spacing. Similar to some of the  
354 previous studies of terrestrial lateral undulation through arrays of pegs with a limited range of  
355 spacing (Bennet et al., 1974; Jayne, 1986), our results would have suggested that speed simply  
356 increases with increased peg spacing rather than being optimized at an intermediate value if we  
357 had not included the largest peg spacing.

358 In addition to affecting speed, peg spacing also can affect the number of waves,  
359 waveform, body posture, and number of pegs touched by undulating snakes. For example, the

360 number of undulations decreases with increased distance between pegs for both garter snakes  
361 (Kelley et al., 1997) and the brown treesnakes in our study. For the peg spacing that maximizes  
362 speed, both garter snakes and brown treesnakes commonly have four to six half waves. Previous  
363 illustrations of terrestrial locomotion show that the angle of the body of snakes ( $\alpha$ ) often  
364 increases with increased distance between pegs (Gray and Lissmann, 1950, Fig. 6; Kelly et.,  
365 1997, Fig. 5), and we observed this for the uphill locomotion of the brown treesnakes but not for  
366 their horizontal locomotion (Figs 3, 7A). The number of pegs touched by the snakes in our study  
367 decreased more rapidly with increased peg distance than the number of crossing regions (Fig. 4).  
368 Consequently, even though the brown treesnakes touched an average of only two pegs for the  
369 conditions that maximized speed on the horizontal surface, nearly half of the nodes between  
370 undulations were not associated with a peg. Unfortunately, previous studies of locomotor  
371 performance for snakes crawling through arrays of pegs have not systematically quantified the  
372 number of pegs touched.

373 The effects of peg spacing on lateral displacement (wave amplitude) differ for the  
374 terrestrial lateral undulation of garter snakes compared to the arboreal undulation of brown  
375 treesnakes. With increased peg distance the amplitude of lateral undulations of garter snakes  
376 nearly doubles (Kelley et al., 1997, Fig. 5), whereas that of the brown treesnakes was nearly  
377 constant for all but the smallest peg spacing used in our experiments (Fig. 6C). The large  
378 increase in wave amplitude for garter snakes results in their head-to-tail distance decreasing from  
379 approximately 70% TL to 50% TL with increased peg distance, whereas that of the brown  
380 treesnakes was usually larger and nearly constant (~80% TL). Increased wave amplitude usually  
381 correlates well with increased wavelength both for undulations of a snake in different  
382 environments and for undulations at different longitudinal locations within the snake in a given  
383 environment (Gray and Lissmann, 1950; Jayne, 1985; Jayne and Davis, 1991; Kelley et al.,  
384 1997), whereas the small wave amplitudes that we observed for the arboreal locomotion of the  
385 brown treesnakes were nearly independent of wavelength (Figs 3A, 6C). Such small wave  
386 amplitudes could reduce the tendency for long-axis rolling during horizontal locomotion by  
387 decreasing the amount of unsupported weight and decreasing the length of the lever arm that  
388 contributes to the rolling torque acting on each half wave. For a given peg spacing, the brown  
389 treesnakes also had undulations with very similar shape along the lengths of their bodies when

390 moving horizontally, and if the rolling torques acting on each undulation to the left and right are  
391 equal, then maintaining balance should be easier.

392 Variable body orientations and numbers of contact points can have important  
393 consequences for the orientation and magnitude of forces that are relevant for undulatory  
394 propulsion (Gray and Lissmann, 1950). For the snakes in our study, the values of body angle,  $\alpha$ ,  
395 can provide a good estimate of the orientation of the reaction forces arising from pressing against  
396 the peg after making a correction for the frictional resistance between the snake and the peg (Fig.  
397 8). For the surfaces that we used, the coefficient of static friction for snake skin is 0.28 (Astley  
398 and Jayne, 2007), which would cause a difference of approximately 16 deg between the  
399 orientation of the normal force and the resultant reaction force (Fig. 8). Sliding friction is less  
400 than static friction, which would reduce the value of this correction. The grand mean of  $\alpha$  for  
401 brown treesnakes moving on the horizontal surfaces was 36 deg, which suggests that the angles  
402 of the reaction forces against the pegs commonly approximated 45 deg and thus the ratio of the  
403 magnitudes of the forward and lateral components of force should be approximately 1:1 (Fig. 8).

404 The only experimental data for the reaction forces of snakes performing lateral  
405 undulation past a series of pegs are those of (Gray and Lissmann, 1950), who observed a snake  
406 crawling on planar horizontal surfaces for five treatments with a range of one to nine contact  
407 points. The spacing between successive contact points (pendulums) for these treatments with  
408 two, three, and four contact points was approximately 17% TL, whereas that of the treatment  
409 with nine pendulums was approximately one-half that value. From the least to most contact  
410 points, the ratios of the total lateral to longitudinal components of the reaction force were 0, 0.12,  
411 0.94, 1.39 and 2.27, respectively, and these values correspond to average angles of the reaction  
412 force relative to the direction of forward travel of approximately 0, 7, 43, 54 and 66 deg,  
413 respectively. The corresponding average values of body angle thus ranged from approximately  
414 90 deg for treatment with a single pendulum to less than 30 for the largest number of contact  
415 points. Thus, even when the spacing between contact points was constant, the ratio of sideways  
416 to forward forces increased with increased number of contact points, and the two treatments with  
417 the most contact points support the conclusion that the ratio of lateral to forward components of  
418 forces also increases with decreased distance between peg-like contact points. Although forces  
419 were quantified in this study (Gray and Lissmann, 1950), neither speed nor locomotor mode was  
420 determined.

421 Variation in the ratio of the lateral- to forward-directed reaction forces seems unlikely to  
422 account for all of the differences in performance that we observed for the brown treesnakes  
423 moving on the horizontal surfaces because  $\alpha$  was nearly constant regardless of peg spacing (Fig.  
424 7C). Perhaps the greater number of changes in the direction of momentum associated with a  
425 greater number of undulations contributed to decreased speed when the space between pegs was  
426 small. Unlike pegs protruding from a planar surface, pegs on a cylindrical surface seem likely to  
427 have the dual functions of providing sites for generating propulsive force as well as preventing  
428 long-axis roll of the snake about the cylinder supporting its weight. Large values of  $\alpha$  could  
429 enhance the ratio of propulsive to lateral force, but the nearly constant body orientation of  
430 approximately 45 deg at the pegs on the horizontal cylinder further suggests the primacy of  
431 maintaining balance rather than generating thrust on these surfaces. Consequently, the decrease  
432 in performance when moving on the surface with the largest distance between pegs may have  
433 arisen primarily from the difficulties associated with maintaining balance.

434 Several factors suggest that the constraints on speed of the snakes climbing vertically  
435 differ substantially from those for the snakes moving horizontally. For example, when climbing  
436 vertical cylinders, the direction of the weight vectors for alternating loops of the snakes are  
437 parallel to the cylinder and thus should not contribute directly to long-axis rolling. Indeed, we  
438 observed very little long-axis rolling for snakes in these circumstances despite the snakes having  
439 consistently larger values of lateral displacement than were observed for horizontal locomotion  
440 (Fig. 6C). Despite little apparent need to counteract long-axis rolling, the maximal speeds during  
441 vertical climbing were slower than those for the horizontal surface, and the maximal vertical  
442 speeds lacked any clear pattern of change with peg spacing. The large values of  $\alpha$  for snakes  
443 crawling vertically while touching only one or two pegs (Figs. 3B, 7C) should reduce the  
444 magnitude of laterally directed forces, and this may have increased the ease of dealing with these  
445 forces and helped to prevent a decrease in performance similar to that which occurred for the  
446 largest peg spacing when snakes crawled horizontally. The ventral curvature of the snake  
447 interacting with the underlying cylinder provides another potential mechanism for balancing left  
448 and right lateral forces in addition to modulating the orientation of the body at the pegs.

449 Some additional effects of body weight also differ for snakes climbing vertically versus  
450 those moving horizontally. For example, snakes climbing vertically must apply sufficient force  
451 to lift their entire weight,  $\mathbf{W}$ , whereas the weight of snakes moving horizontally produces a



452 ventral frictional resistance equal to  $\mu W$ , where  $\mu$  is the coefficient of friction (Gray and  
453 Lissmann, 1950). Snakes climbing vertically should have a negligible amount of ventral friction.  
454 For both vertical and horizontal lateral undulation, the snakes will also encounter a lateral  
455 frictional resistance where the body contacts the pegs, and this should be greater for vertical  
456 movement since the snakes should have to press harder against the pegs to overcome their  
457 weight rather than primarily the (lesser) ventral frictional resistance when the snake moves  
458 horizontally. Consequently, the force required to move vertically should exceed that required to  
459 move horizontally by more than  $(1-\mu)W$ . Thus, generating propulsive force seems more likely to  
460 limit vertical climbing speed, whereas horizontal arboreal lateral undulation may be limited more  
461 by factors involving coordination and balance.

462 The different body orientations that we observed for snakes climbing vertically could  
463 result from the snakes actively controlling their body posture to optimize the orientations of  
464 forces, or the increased values of  $\alpha$  (Fig. 3B) could also arise from greater amounts of passive  
465 bending resulting from fewer pegs being used to generate the same total amount of propulsive  
466 force. Most vertebrates with elongated body plans have acquired them via increased numbers of  
467 body segments (Ward and Mehta, 2011), and if the mobility per joint is constant, then an  
468 increased number of joints per unit length can enhance the flexibility of the body. Snakes are  
469 certainly a noteworthy group for having both large numbers of vertebrae (Hoffstetter and Gasc,  
470 1969) and an ability to bend readily, but variation in the morphology of muscles is also likely to  
471 have consequences for axial flexibility and how it is controlled. For example, the numbers of  
472 vertebrae spanned and lengths of tendon relative to the lengths of contractile tissue within certain  
473 major axial muscles segments of specialized arboreal colubroid snakes, such as the species we  
474 studied, are greater than those for nearly all groups of snakes that are not arboreal (Jayne, 1982).  
475 Not only is tendon stiff, but when there are greater proportions of tendon in individual axial  
476 muscle segments, a greater amount of length change in the contractile tissue will be required to  
477 accommodate the same amount of axial banding as in a different species with a higher proportion  
478 of contractile tissue per axial muscle segment. Hence, this morphological specialization may  
479 facilitate enhancing axial stiffness, which may in turn facilitate supporting the body of arboreal  
480 snakes in between branches (Hoefler and Jayne, 2013) or be well suited for moving using a  
481 minimal number of contact points (Ruben, 1977). Such long tendons also might enhance the

482 ability of these snakes to cope with the large and very localized loads that occur when they climb  
483 vertically using undulation past only one or two points of support.

484 Many aspects of the shape of the brown treesnakes did change with peg spacing, but  
485 some details of waveform and body shape did not conform strictly to either peg spacing or some  
486 other features of the supporting surfaces. For example, with the smallest peg spacing the snakes  
487 commonly did not contact each successive peg as they often used a larger waveform than would  
488 be possible if they did this (Fig. 3). Similarly, the ventral curvature of the snakes was usually far  
489 less than the tight conformity to the circumference of a cylindrical surface that is probably  
490 required to generate an effective frictional grip, as has been described for arboreal concertina  
491 locomotion (Astley and Jayne, 2007; Jayne and Herrmann, 2011). Nonetheless, the amount of  
492 ventral curvature and total dorso-ventral displacement that we observed for arboreal lateral  
493 undulation does seem likely to exceed that which occurs during lateral undulation on natural  
494 terrestrial surfaces even though many of them can deviate substantially from a simple horizontal  
495 plane.

496 The extent to which the ventral curvature of snakes on arboreal surfaces is caused  
497 actively or passively poses an interesting area for future work. Ventral curvature when the  
498 snakes climbed vertical surfaces seems quite likely to be caused by active ventral flexion of the  
499 snake, but for snakes moving horizontally on a cylindrical surface ventral curvature could be  
500 caused solely by the weight of the snake. In this latter case activity of the most dorsal muscles  
501 might occur bilaterally to prevent or modulate the amount of sagging in a fashion similar to how  
502 these muscles arch the back of snakes during sidewinding locomotion with a motor pattern that  
503 deviates from that of terrestrial lateral undulation (Jayne, 1988). Modulating the depth and width  
504 of the waves of snakes while on cylindrical surfaces could also serve as an important mechanism  
505 for enhancing the stability arboreal snake locomotion. Hence, all of these factors could cause  
506 arboreal lateral undulation to deviate substantially from some of the major features of terrestrial  
507 lateral undulation while retaining many of the kinematic similarities including a posteriorly  
508 propagated wave, all points following a similar path and continuous sliding contact.

509 Many studies have quantified maximum speeds of diverse species of animals (Irschick  
510 and Garland, 2001). However, much remains to be learned regarding what factors generally  
511 limit speed and the extent to which the constraints on speed vary with physiology, animal body  
512 plan, environmental structure, and interactions between these factors. For example, under some

513 conditions the limbs of some small lizards have stride frequencies close to those predicted based  
514 on the time course of force development and relaxation of a single muscle twitch (Marsh and  
515 Bennett, 1985), but the frequencies of undulation of snakes observed in this and other studies are  
516 so slow that this factor is irrelevant to their maximal locomotor speeds. Our results also provide  
517 a striking example of how different aspects of environmental structure can have interactive  
518 effects on locomotor performance and can create some circumstances where force production  
519 may limit speed and other circumstances where balance and coordination may be the primary  
520 constraints on performance. Although the need for balance may seem most obvious for animals  
521 moving on narrow branches, investigating the rich complexity of additional natural habitats  
522 (Tucker and McBrayer, 2012) seems likely to hold much additional promise for identifying  
523 factors besides muscle force production (Higham et al., 2011) that may limit locomotor  
524 performance.

525

526

527

#### ACKNOWLEDGMENTS

528 The collection of snakes in Guam was possible thanks to the assistance and kindness of G.  
529 Rodda and B. Lardner of the USGS Brown Treesnake project, J. Schwagerl and the staff of the  
530 Guam National Wildlife Refuge, and C. Clark and the staff of USDA – APHIS Wildlife Services  
531 Guam. M. Hoefler and C. Jayne provided helpful comments on a draft of the manuscript.

532

533

#### FUNDING

534 This work was supported by a grant from the National Science Foundation [IOS 0843197 to  
535 B.C.J.].

536

## REFERENCES

- 537
- 538
- 539 **Anderson, N. L., Hetherington, T. E., Coupe, B., Perry, G., Williams, J. B. and Lehman, J.**  
 540 (2005). Thermoregulation in a nocturnal, tropical, arboreal snake. *J. Herpetol.* **39**, 82-90.
- 541 **Astley, H. C. and Jayne, B. C.** (2007). Effects of perch diameter and incline on the kinematics,  
 542 performance and modes of arboreal locomotion of corn snakes (*Elaphe guttata*). *J. Exp.*  
 543 *Biol.* **210**, 3862-3872.
- 544 **Astley, H. C. and Jayne, B. C.** (2009). Arboreal habitat structure affects the performance and  
 545 modes of locomotion of corn snakes (*Elaphe guttata*). *J. Exp. Zool.* **311A**, 207-216.
- 546 **Bennet, S., McConnel.T and Trubatch, S. L.** (1974). Quantitative-analysis of speed of snakes  
 547 as a function of peg spacing. *J. Exp. Biol.* **60**, 161-165.
- 548 **Gans, C.** (1962). Terrestrial locomotion without limbs. *Am. Zool.* **2**, 167-182.
- 549 **Gans, C.** (1974). *Biomechanics. An Approach to Vertebrate Biology*. Ann Arbor: University of  
 550 Michigan Press.
- 551 **Gasc, J. P., Cattaert, D., Chaserat, C. and Clarac, F.** (1989). Propulsive action of a snake  
 552 pushing against a single site: its combined analysis. *J. Morphol.* **201**, 315-329.
- 553 **Goodman, B. A.** (2009). Nowhere to run: the role of habitat openness and refuge use in defining  
 554 patterns of morphological and performance evolution in tropical lizards. *J. Evol. Biol.* **22**,  
 555 1535-1544.
- 556 **Gray, J.** (1946). The mechanism of locomotion in snakes. *J. Exp. Biol.* **23**, 101-120.
- 557 **Gray, J.** (1968). *Animal Locomotion*. London: Weidenfield and Nicolson.
- 558 **Gray, J. and Lissmann, H. W.** (1950). The kinetics of locomotion of the grass snake. *J. Exp.*  
 559 *Biol.* **94**, 15-42.
- 560 **Hampton, P. M.** (2011). Ventral and sub-caudal scale counts are associated with macrohabitat  
 561 use and tail specialization in viperid snakes. *Evol. Ecol.* **25**, 531-546.
- 562 **Heckrotte, C.** (1967). Relations of body temperature, size, and crawling speed of the common  
 563 garter snake, *Thamnophis s. sirtalis*. *Copeia* **1967**, 759-763.
- 564 **Higham, T. E., Korchari, P. G. and McBrayer, L. D.** (2011). How muscles define maximum  
 565 running performance in lizards: an analysis using swing- and stance-phase muscles. *J.*  
 566 *Exp. Biol.* **214**, 1685-1691.
- 567 **Hoefler, K. M. and Jayne, B. C.** (2013). Three-dimensional locations of destinations have  
 568 species-dependent effects on the choice of paths and the gap-bridging performance of  
 569 arboreal snakes. *J. Exp. Zool. A* **319**, 124-137.
- 570 **Hoffstetter, R. and Gasc, J.-P.** (1969). Vertebrae and ribs of modern reptiles. In *Biology of the*  
 571 *Reptilia. Vol. 1.*, (ed. C. Gans, T. S. Parsons and A. A. Bellairs), pp. 201-310. New York:  
 572 Academic Press.
- 573 **Hu, D. L., Nirody, J., Scott, T. and Shelley, M. J.** (2009). The mechanics of slithering  
 574 locomotion. *Proc. Natl. Acad. Sci. USA* **106**, 10081-10085.
- 575 **Hyams, S. E., Jayne, B. C. and Cameron, G. N.** (2012). Arboreal habitat structure affects  
 576 locomotor speed and perch choice of white-footed mice (*Peromyscus leucopus*). *J. Exp.*  
 577 *Zool. A* **317A**, 540-551.
- 578 **Irschick, D. J. and Garland, T. J.** (2001). Integrating function and ecology in studies of  
 579 adaptation: Investigations of locomotor capacity as a model system. *Ann. Rev. Ecol. Syst.*  
 580 **32**, 367-396.
- 581 **Jayne, B. C.** (1982). Comparative morphology of the semispinalis-spinalis muscle of snakes and  
 582 correlations with locomotion and constriction. *J. Morphol.* **172**, 83-96.

- 583 **Jayne, B. C.** (1985). Swimming in constricting (*Elaphe g. guttata*) and nonconstricting (*Nerodia*  
584 *fasciata pictiventris*) colubrid snakes. *Copeia* **1985**, 195-208.
- 585 **Jayne, B. C.** (1986). Kinematics of terrestrial snake locomotion. *Copeia* **1986**, 195-208.
- 586 **Jayne, B. C.** (1988). Muscular mechanisms of snake locomotion: an electromyographic study of  
587 the sidewinding and concertina modes of *Crotalus cerastes*, *Nerodia fasciata* and *Elaphe*  
588 *obsoleta*. *J. Exp. Biol.* **140**, 1-33.
- 589 **Jayne, B. C. and Davis, J. D.** (1991). Kinematics and performance capacity for the concertina  
590 locomotion of a snake (*Coluber constrictor*). *J. Exp. Biol.* **156**, 539-556.
- 591 **Jayne, B. C. and Herrmann, M. P.** (2011). Perch size and structure have species-dependent  
592 effects on the arboreal locomotion of rat snakes and boa constrictors. *J. Exp. Biol.* **214**,  
593 2189-2201.
- 594 **Jones, Z. M. and Jayne, B. C.** (2012). Perch diameter and secondary branching have interactive  
595 effects on the locomotion of anole lizards. *J. Exp. Biol.* **215**, 2128-2134.
- 596 **Kelley, K. C., Arnold, S. J. and Glatstone, J.** (1997). The effects of substrate and vertebral  
597 number on locomotion in the garter snake *Thamnophis elegans*. *Func. Ecol.* **11**, 189-198.
- 598 **Lillywhite, H. B. and Henderson, R. W.** (1993). Behavioral and functional ecology of arboreal  
599 snakes. In *Snakes - Ecology and Behavior*, (ed. R. A. Seigel and J. T. Collins), pp. 1-48.  
600 New York: McGraw Hill Inc.
- 601 **Marsh, R. L. and Bennett, A. F.** (1985). Thermal dependence of isotonic contractile properties  
602 of skeletal muscle and sprint performance of the lizard *Dipsosaurus dorsalis*. *J. Comp.*  
603 *Physiol. (B)* **155**, 541-551.
- 604 **Mattingly, W. B. and Jayne, B. C.** (2004). Resource use in arboreal habitats: Structure affects  
605 locomotion of four ecomorphs of *Anolis* lizards. *Ecology* **85**, 1111-1124.
- 606 **Moon, B. R. and Gans, C.** (1998). Kinematics, muscular activity and propulsion in gopher  
607 snakes. *J. Exp. Biol.* **201**, 2669-2684.
- 608 **Moran, M. D.** (2003). Arguments for rejecting the sequential Bonferroni ecological studies.  
609 *Oikos* **100**, 403-405.
- 610 **Pizzatto, L., Almeida-Santos, S. M. and Shine, R.** (2007). Life-history adaptations to  
611 arboreality in snakes. *Ecology* **88**, 359-366.
- 612 **Ruben, J. A.** (1977). Morphological correlates of predatory modes in the coachwhip  
613 (*Masticophis flagellum*) and rosy boa (*Lichanura roseofusca*). *Herpetologica* **33**, 1-6.
- 614 **Tucker, D. B. and McBrayer, L. D.** (2012). Overcoming obstacles: the effect of obstacles on  
615 locomotor performance and behaviour. *Biol. J. Linn. Soc.* **107**, 813-823.
- 616 **Ward, A. B. and Mehta, R. S.** (2011). Axial elongation in fishes: using morphological  
617 approaches to elucidate developmental mechanisms in studying body shape. *Integr.*  
618 *Comp. Biol* **50**, 1106-1119.

619  
620  
621

622 **FIGURE LEGENDS**

623 Fig. 1. Schematic illustration of methods used for analyzing kinematics. The gray rectangle  
 624 represents the primary cylindrical surface of the perch. Black, green, and red circles indicate  
 625 pegs that were not touched by the snakes, pegs that were touched and useful for propulsion, or  
 626 pegs that were touched but not likely to be useful for propulsion, respectively. In this example,  
 627 the number of crossing regions ( $N_{cr}$ ) was 5, and the numbers of propulsive ( $N_{peg\_prop}$ ) and non-  
 628 propulsive pegs ( $N_{peg\_nonprop}$ ) touched were 3 and 1, respectively. Each white wedge indicates  
 629 the angle ( $\alpha$ ) between the tangent of the body of the snake at a propulsive peg and the  $x$ -axis.  
 630 The overall length of the snake from head to tail along the  $x$ -axis is  $x_{ht}$ . For each half wave, the  
 631 length along the  $x$ -axis ( $0.5\lambda$ ) and the lateral amplitude ( $y_{crest}$ ) were recorded. The maximum  
 632 width of the snake ( $y_{max}$ ) was the sum of the greatest magnitudes of  $y_{crest}$  for half waves to the  
 633 left and right. Values of  $x_{crest}$  were expressed as a proportion of  $0.5\lambda$ .

634  
 635 Fig. 2. Tracings from dorsal-view video images of a single snake performing lateral undulation  
 636 on surfaces with different inclines and peg spacing. (A). A horizontal surface with pegs every  
 637 10 cm. (B) Locomotion up a vertical surface with pegs every 80 cm. The times between  
 638 successive images in A and B were 0.3 and 1.2 s, respectively. This snake had SVL and total  
 639 length of 108 and 137 cm, respectively. The white marks on the snake indicate locations of  
 640 approximately 25, 50, 75 and 100% SVL.

641  
 642 Fig. 3. Tracings from dorsal-view video images showing the body posture of a single snake  
 643 while crawling on all ten combinations of incline and peg spacing that were used to test  
 644 performance. The small white circles represent the pegs. The number of waves increased with  
 645 increased numbers of pegs, and the waveforms on the horizontal surfaces are often more  
 646 regular and symmetric than those when the snake was climbing the vertical surface.

647  
 648 Fig. 4. The effects of peg spacing and incline on the mean values of locomotor performance.  $N$   
 649 = 9 individuals. The black circles and red triangles indicate mean values for the horizontal and  
 650 uphill vertical treatment, respectively. For the horizontal surface an intermediate peg spacing  
 651 maximized performance, whereas peg spacing lacked a significant effect on performance for  
 652 snakes crawling up the vertical surface.

653  
 654 Fig. 5. The effects of peg spacing and incline on the mean values involving contact points  
 655 between the snake and the surfaces.  $N = 5$  individuals. The black circles and red triangles

656 indicate mean values for the horizontal and uphill vertical treatment, respectively. (A) The  
 657 number of crossing regions. (B) The total number of pegs touched by the snake. (C) The  
 658 number of propulsive pegs touched. (D) The number of non-propulsive pegs touched. When  
 659 the distance between successive pegs was large, the snakes were more likely to cross the  
 660 primary supporting surface without touching a peg ( $N_{cr} > N_{peg\_all}$ ). When snakes crawled up the  
 661 vertical surface, the pegs touched by snakes were almost always located posterior to the body  
 662 of the snake, whereas snakes crawling on horizontal surfaces with the smallest distance  
 663 between pegs often touched one or two pegs anterior to the body.

664  
 665  
 666 Fig. 6. The effects of peg spacing and incline on the mean values of lateral and vertical location  
 667 of wave crests.  $N = 5$  individuals. The black circles and red triangles indicate mean values for  
 668 the horizontal and uphill vertical treatment, respectively. (A) The maximum width of the snake.  
 669 Snakes climbing up vertical surfaces often used more lateral space. (B) The maximum depth of  
 670 a wave crest. (C) The lateral amplitude of half waves was greater for vertical locomotion. (D)  
 671 The depth of half waves. The depth of half waves of snakes crawling up the vertical surface  
 672 was greater than that of the horizontal surface for the largest distance between pegs, and for  
 673 horizontal locomotion the greatest mean value coincided with the conditions that maximized  
 674 performance.

675  
 676 Fig. 7. The effects of peg spacing and incline on the mean values of waveform and overall  
 677 posture.  $N = 5$  individuals. The black circles and red triangles indicate mean values for the  
 678 horizontal and uphill vertical treatment, respectively. (A) Wave crest location. Asymmetric half  
 679 waves were most common for snakes crawling up the vertical surface with the largest distance  
 680 between pegs. (B) Half wave length. (C) The angle ( $\alpha$ ) of the body of the snake at the point of  
 681 contact with the pegs. For snakes climbing up the vertical surface,  $\alpha$  increased asymptotically  
 682 to a value of 90 deg as peg spacing increased, whereas peg spacing for the horizontal surface  
 683 had little effect on  $\alpha$ . (D) The head-to-tail distance of the snakes.

684  
 685 Fig. 8. A schematic diagram of the orientation of forces acting on a peg. The light gray  
 686 rectangle represents the body of the snake oriented relative to the peg (dark gray circle) with the  
 687 value of the grand mean of  $\alpha$  observed for all peg spacings for the horizontal surface. The red  
 688 arrows show how a given normal force applied by the snake against a peg generates a frictional  
 689 force that opposes the movement past the peg, and the resultant sum of these two vectors is

690 oriented postero-medially (Gray and Lissmann, 1950). The black arrows indicate the  
691 corresponding reaction forces with a resultant that is oriented antero-medially, and black  
692 dashed arrows indicate the magnitudes of the forward (propulsive) and sideways components of  
693 the reaction force in this example are approximately equal. Note that frictional resistance  
694 against the peg causes the resultant reaction force to be oriented closer to the overall direction  
695 of travel (~ 16 deg) compared to the orientation of the normal reaction force.  
696



697 Table 1. Effects of peg spacing and incline on kinematics

| Dependent variable | ANOVA effect              |                          |                                     |
|--------------------|---------------------------|--------------------------|-------------------------------------|
|                    | Spacing<br>(d.f. = 4, 16) | Incline<br>(d.f. = 1, 4) | Spacing x Incline<br>(d.f. = 4, 16) |
| $N_{cr}$           | 8.9 (0.001)               | 35.8 (0.004)             | 1.6 (0.225)                         |
| $N_{peg\_all}$     | 97.6 (<0.001)             | 4 (0.115)                | 2.2 (0.11)                          |
| $N_{peg\_prop}$    | 126.2 (<0.001)            | 1.4 (0.306)              | 1 (0.455)                           |
| $N_{peg\_nonprop}$ | 4.3 (0.015)               | 8.7 (0.042)              | 3.7 (0.025)                         |
| $y_{crest}$        | 3.8 (0.024)               | 77.8 (0.001)             | 0.2 (0.948)                         |
| $z_{crest}$        | 7.9 (0.001)               | 10 (0.034)               | 1.6 (0.223)                         |
| $y_{max}$          | 5.9 (0.004)               | 48.3 (0.002)             | 0.1 (0.991)                         |
| $z_{max}$          | 5.8 (0.004)               | 0.1 (0.803)              | 1 (0.448)                           |
| $0.5\lambda$       | 3.1 (0.044)               | 6.3 (0.066)              | 0.9 (0.508)                         |
| $x_{crest}$        | 2.4 (0.098)               | 11.3 (0.028)             | 2.9 (0.055)                         |
| $\alpha$           | 49.4 (<0.001)             | 473.5 (<0.001)           | 9.9 (<0.001)                        |
| $x_{ht}$           | 3.2 (0.043)               | 7.2 (0.055)              | 0.2 (0.926)                         |

Values are  $F(P)$ . Abbreviations:  $N_{cr}$ , number of crossing regions.  $N_{peg\_all}$ , total number of pegs touched by the snake.  $N_{peg\_prop}$ , number of propulsive pegs touched by a snake.  $N_{peg\_nonprop}$ , number of non-propulsive pegs touched by a snake.  $y_{crest}$ , lateral amplitude of a half wave.  $z_{crest}$ , depth of a half wave.  $y_{max}$ , maximum width of a snake.  $z_{max}$ , maximum depth of half waves.  $0.5\lambda$ , half wave length.  $x_{crest}$ , location of wave crest.  $\alpha$ , angle of snake body at point of peg contact.  $x_{ht}$ , head-to-tail distance.

698

699

700

Fig. 1

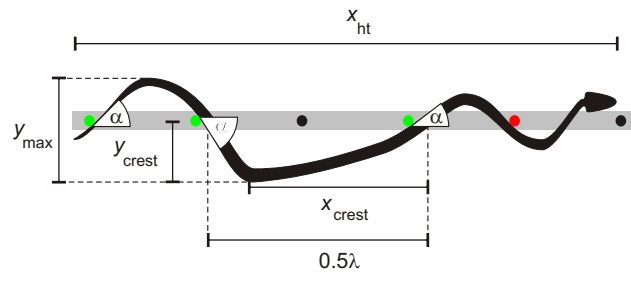

Fig. 2

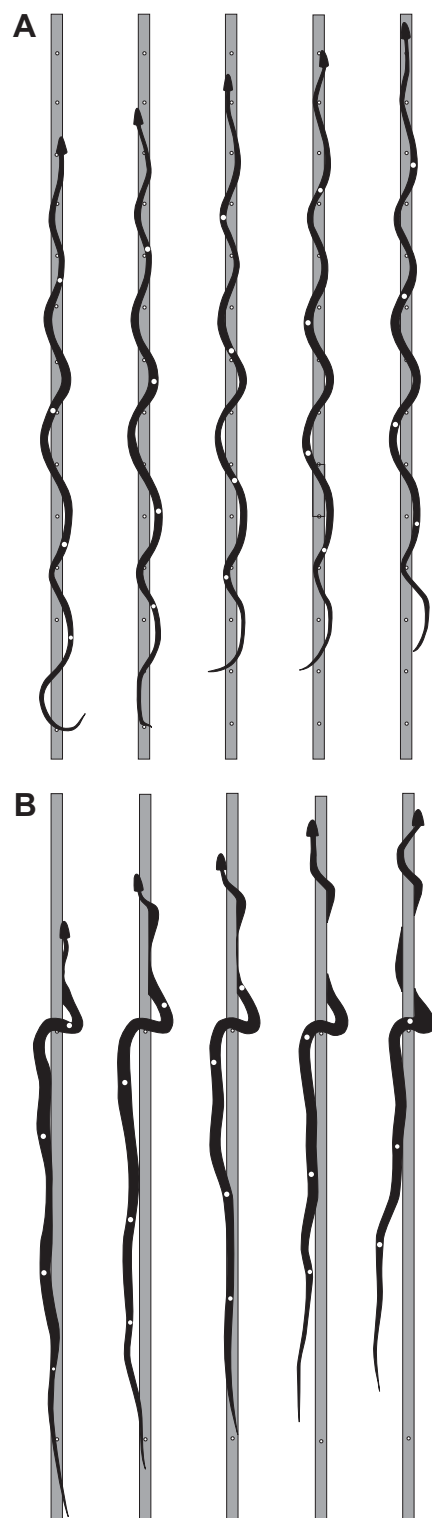

Fig. 3

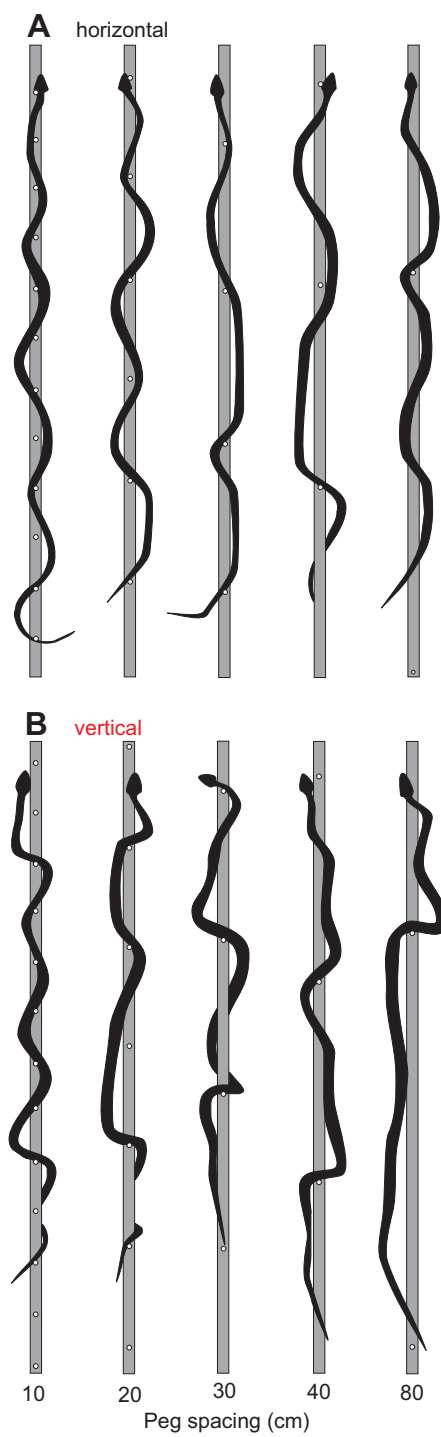

Fig. 4

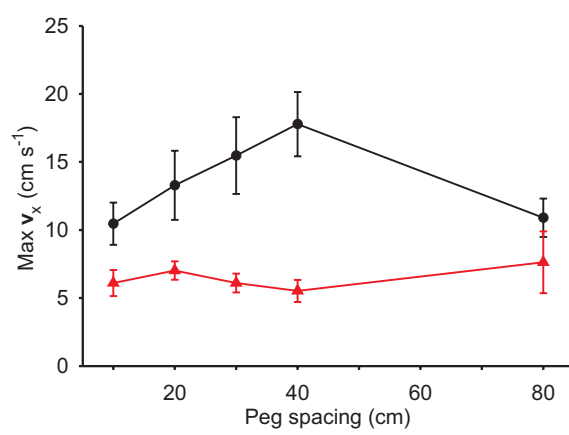

Fig. 5

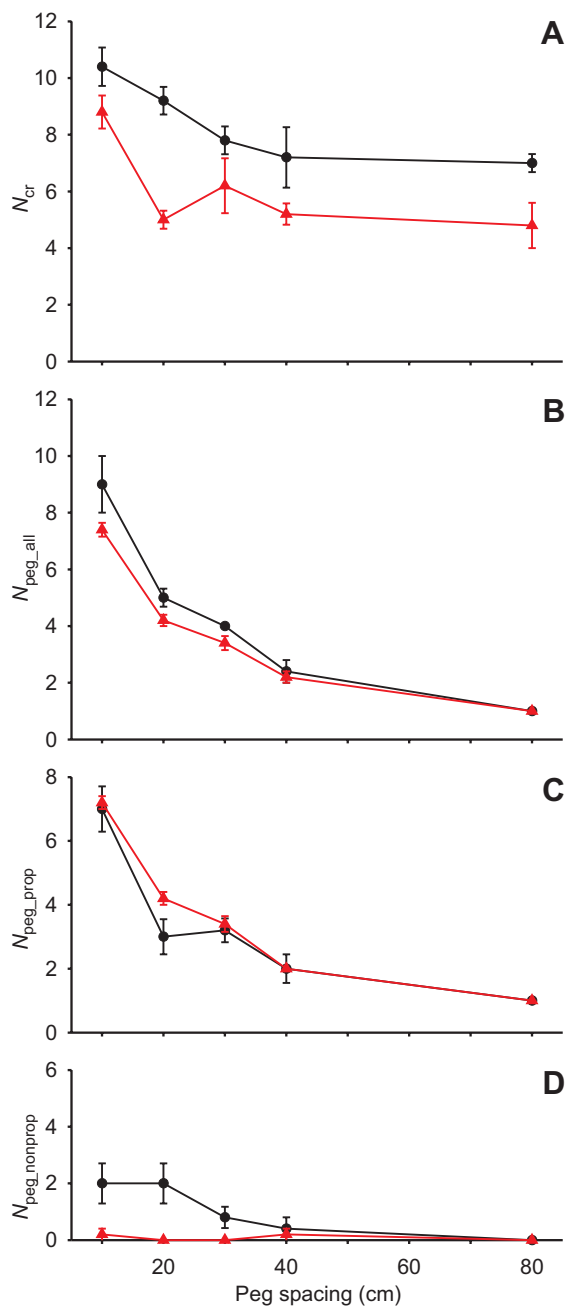

Fig. 6

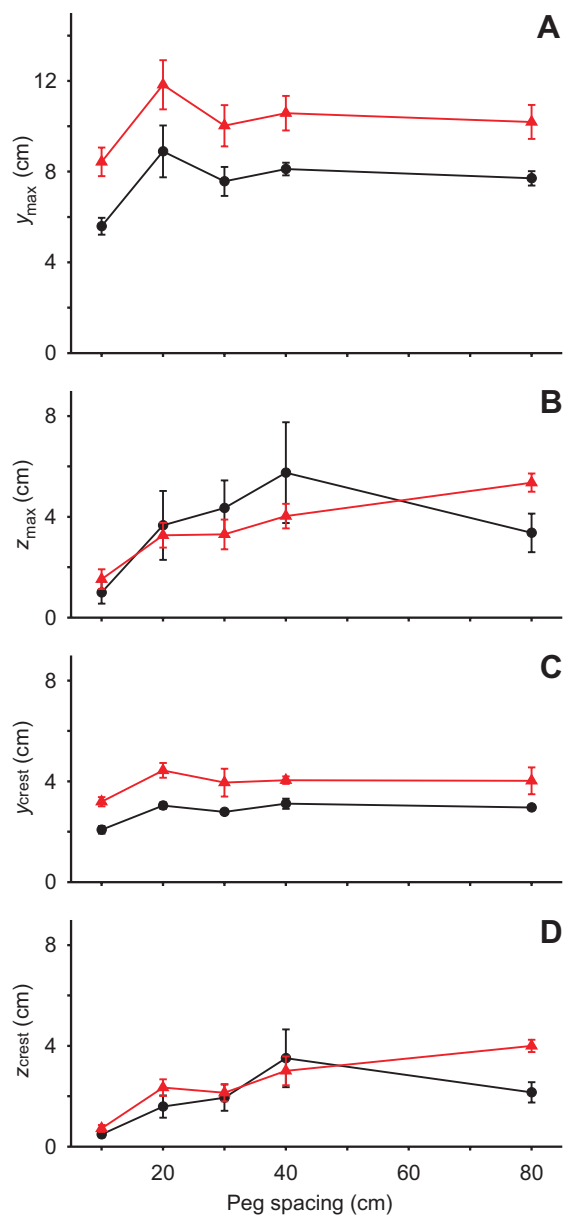

Fig. 7

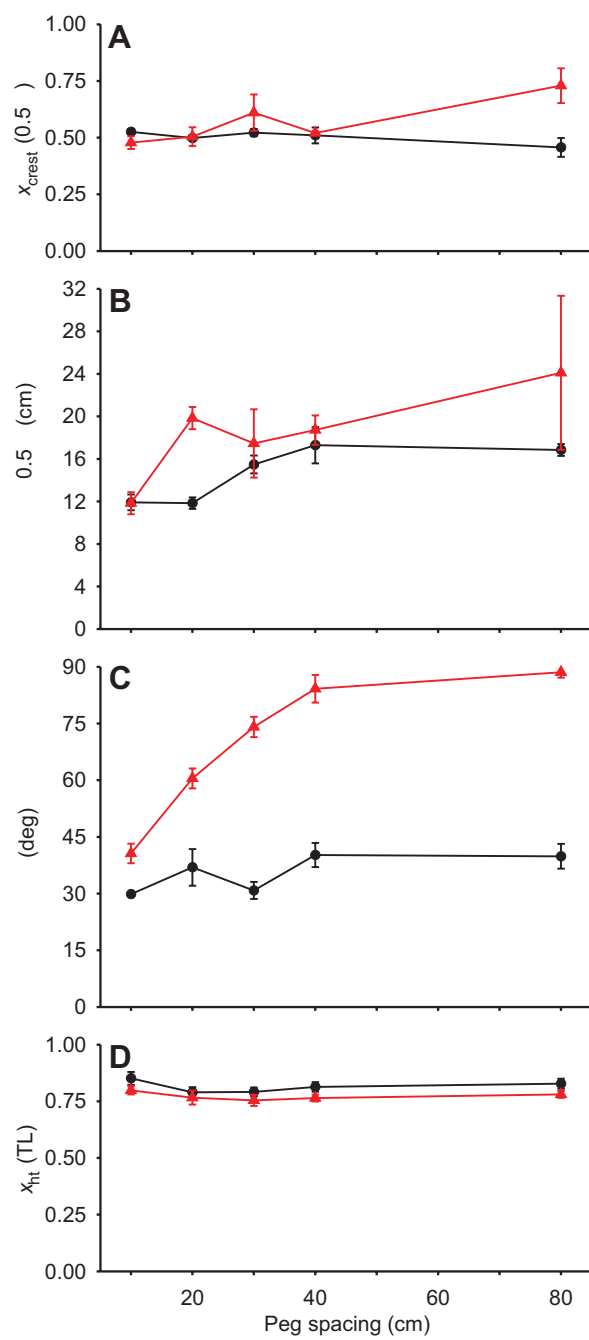



Fig. 8

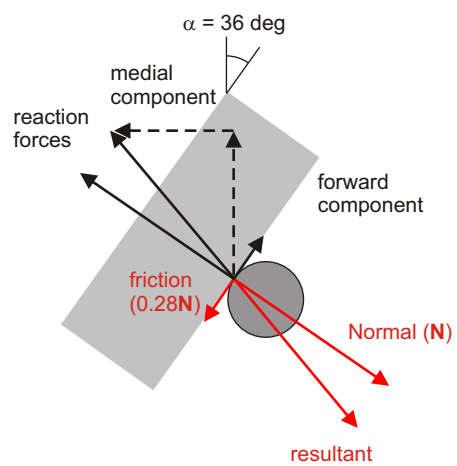

Source: https://cob.silverchair.com/jeb/article-pdf/doi/10.1242/jeb.086652/2036894/jeb_086652.pdf
